# Supplementary material for: Chronic Ouabain Targets Pore-Forming Claudin-2 and Ameliorates Radiation-Induced Damage to the Rat Intestinal Tissue Barrier
Source: MDPI journal article supplement (doi:10.3390/ijms25010278), 2023-12-24

Jejunum

# Claudin-1

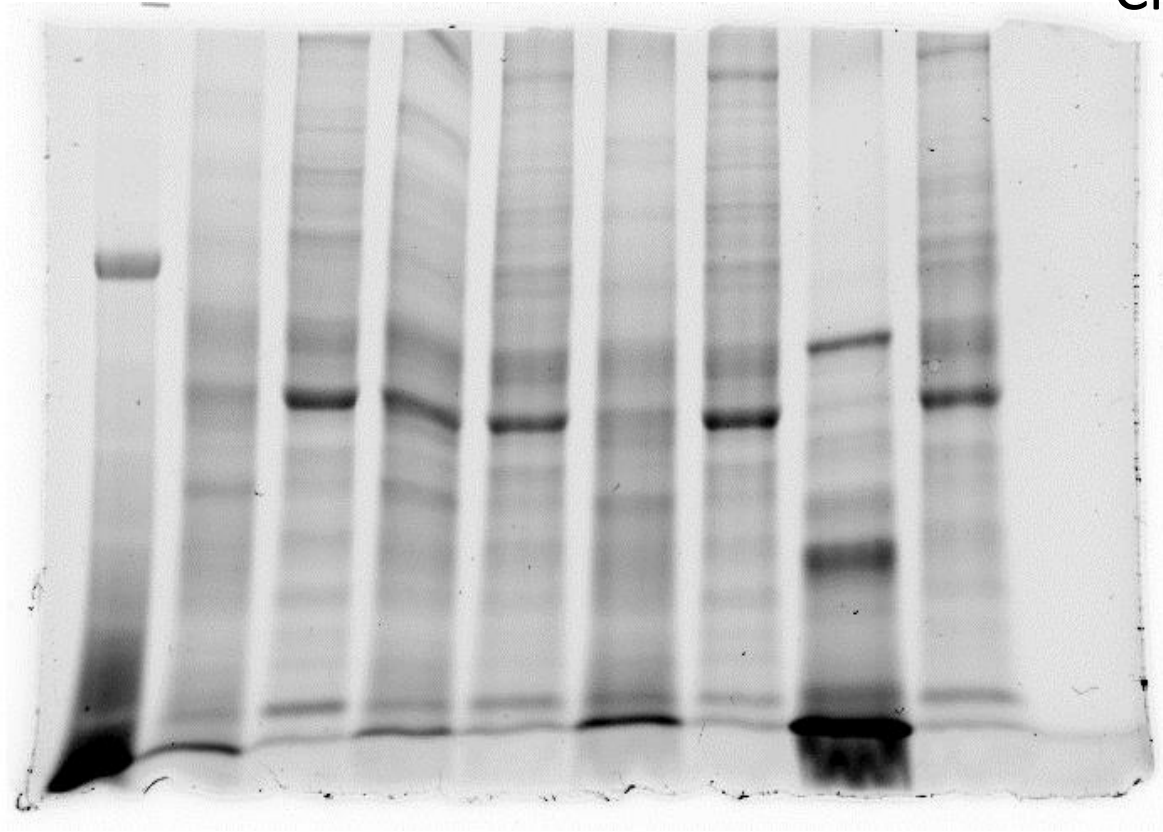

Kda:

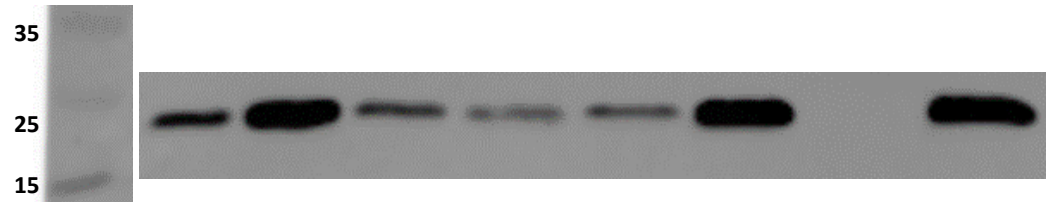

↑  
Control

↑  
Radiation

↑  
Ouabain

↑  
Ouabain +  
Radiation

↑  
Control

↑  
Radiation

↑  
Ouabain

↑  
Ouabain +  
Radiation

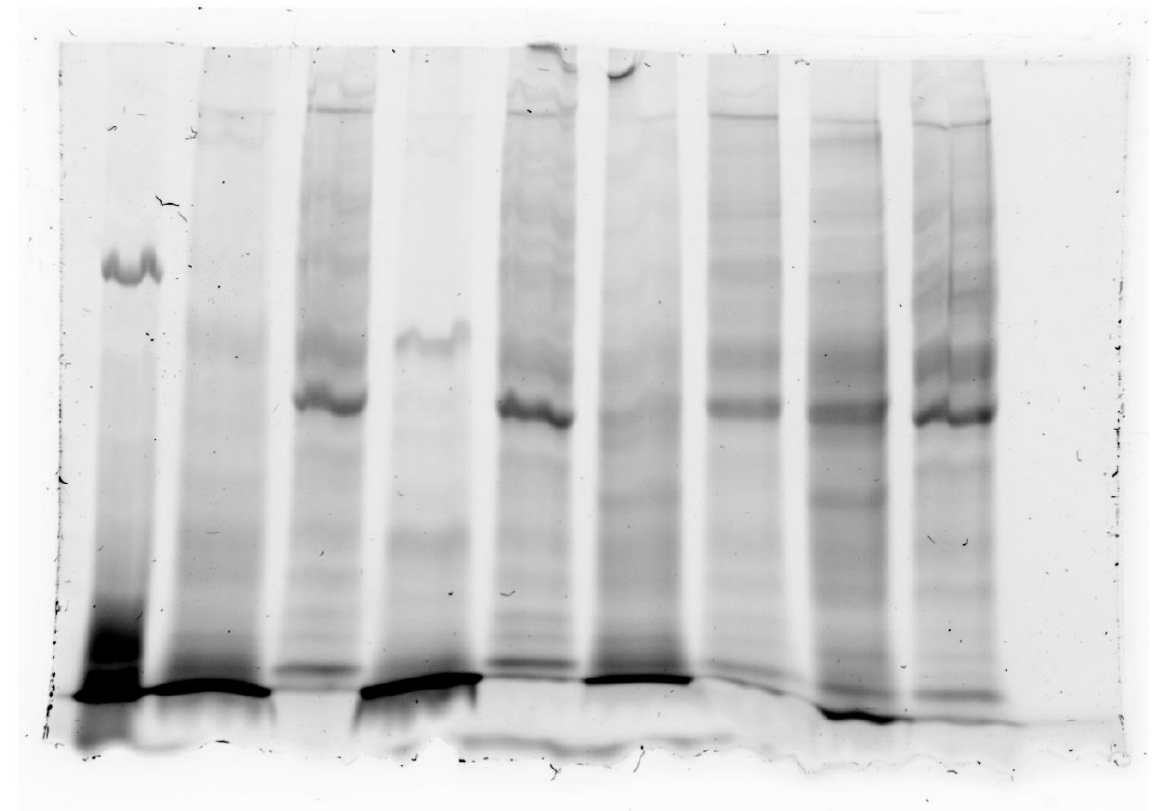

Kda:

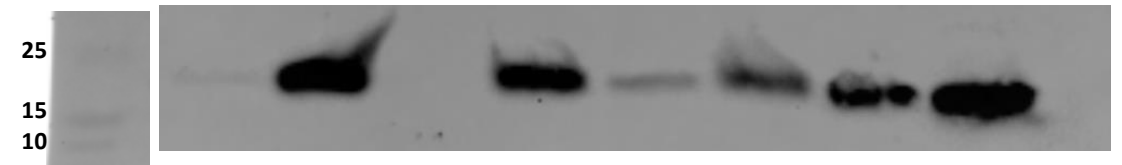

↑  
Control

↑  
Radiation

↑  
Ouabain

↑  
Ouabain +  
Radiation

↑  
Control

↑  
Radiation

↑  
Ouabain

↑  
Ouabain +  
Radiation

# Claudin-2

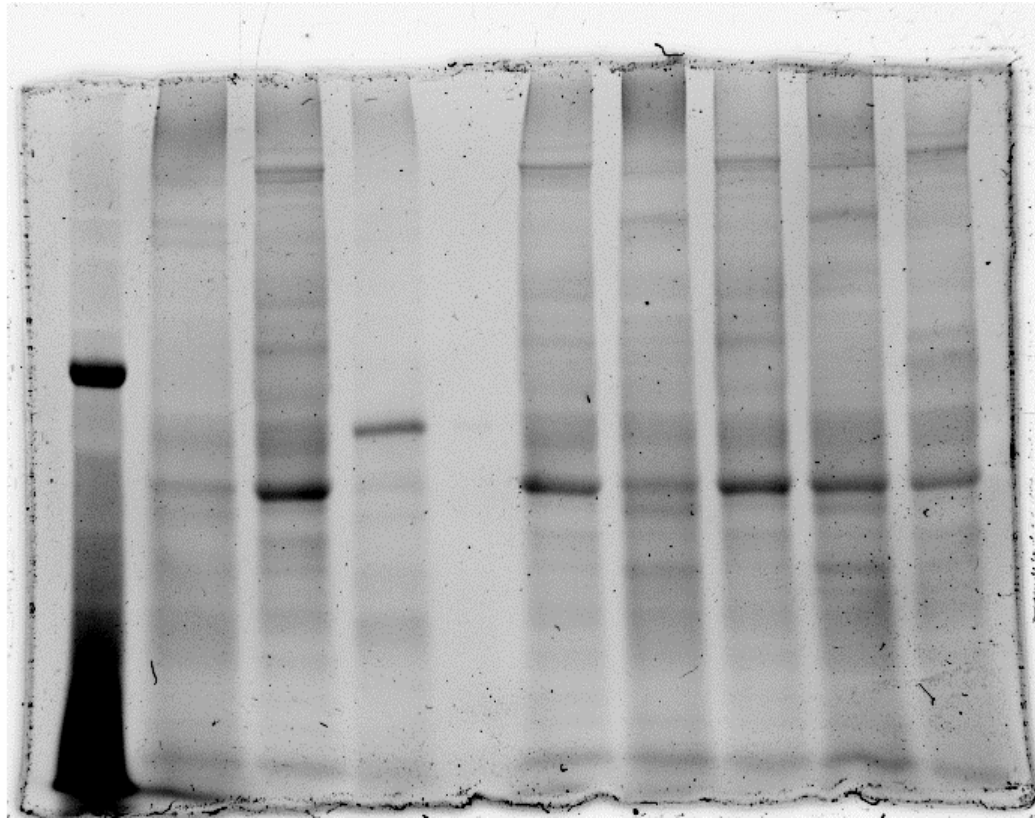

Kda:

25  
15  
10

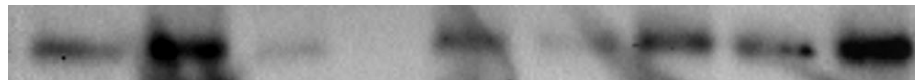

↑  
Control

↑  
Radiation

↑  
Ouabain

↑  
Ouabain +  
Radiation

↑  
Control

↑  
Radiation

↑  
Ouabain

↑  
Ouabain +  
Radiation

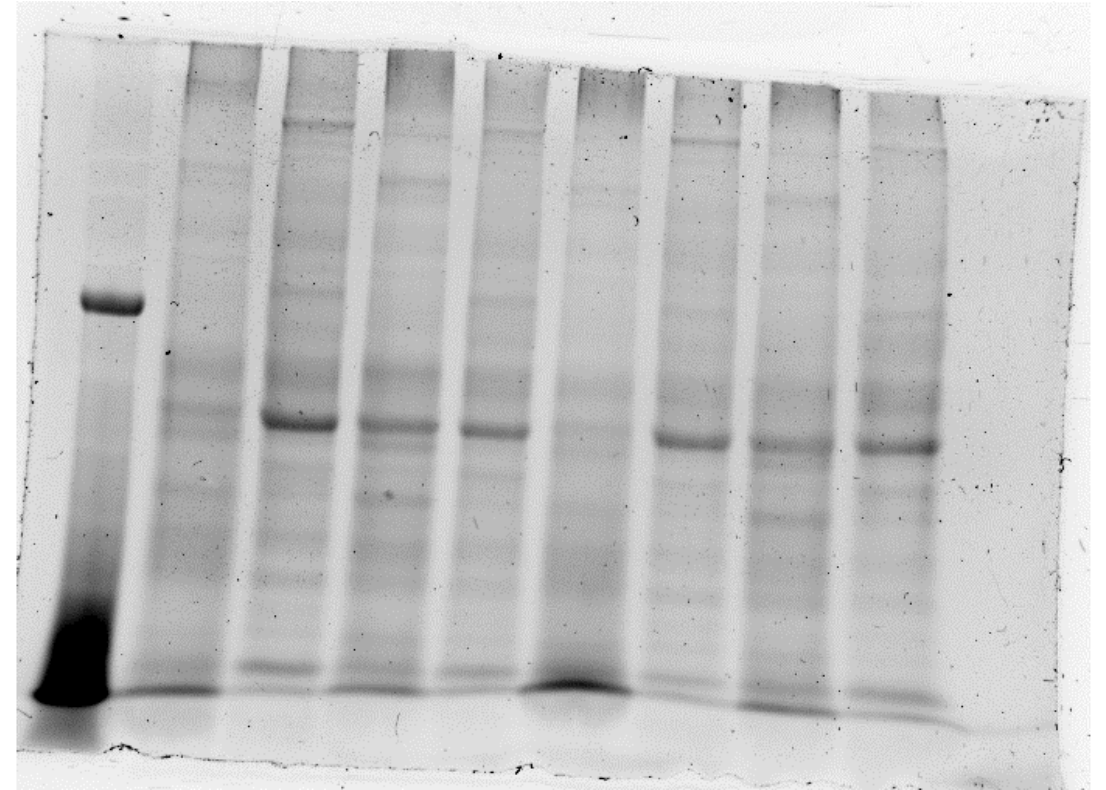

Kda:

25  
15  
10

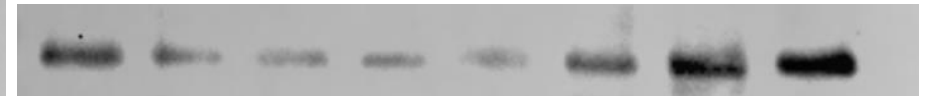

↑  
Control

↑  
Radiation

↑  
Ouabain

↑  
Ouabain +  
Radiation

↑  
Control

↑  
Radiation

↑  
Ouabain

↑  
Ouabain +  
Radiation



# Claudin-3

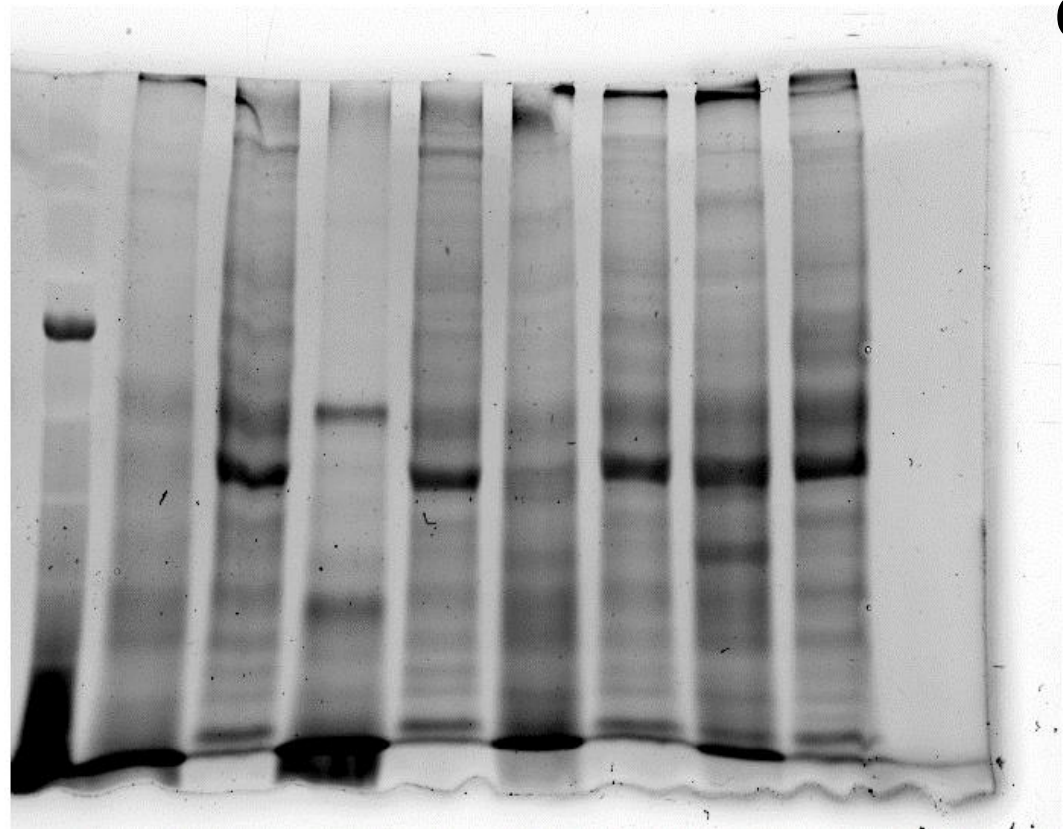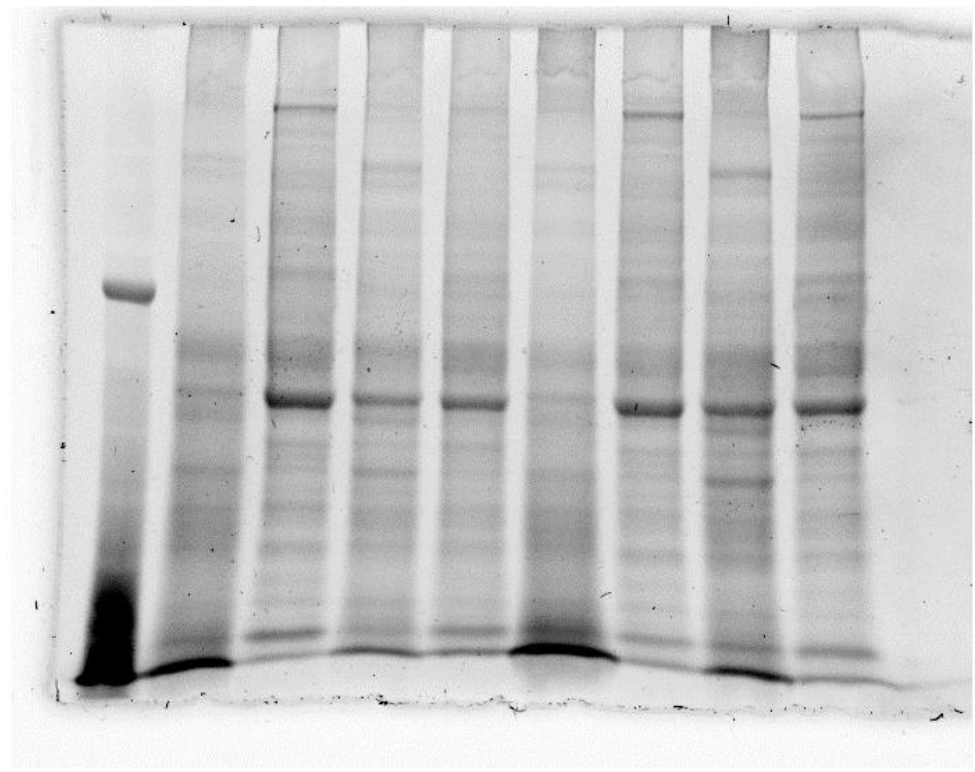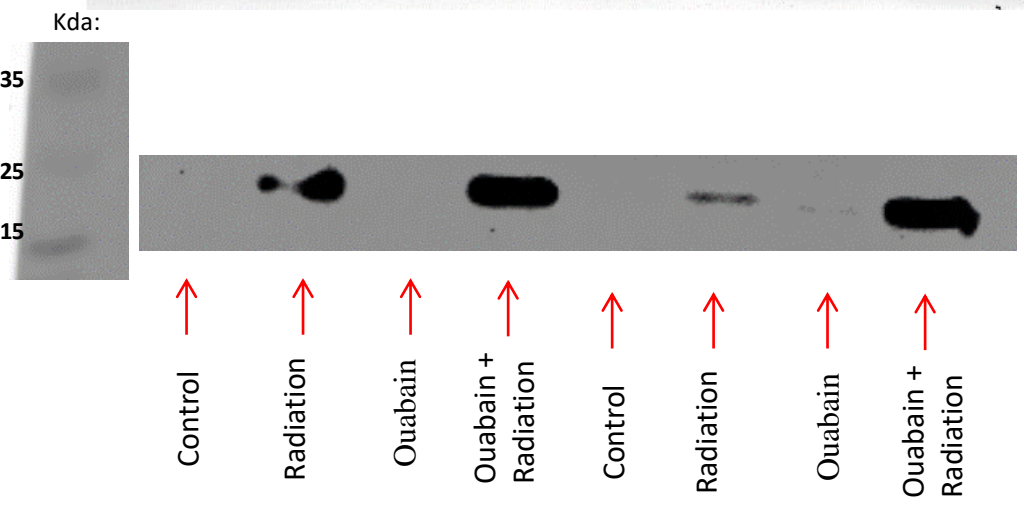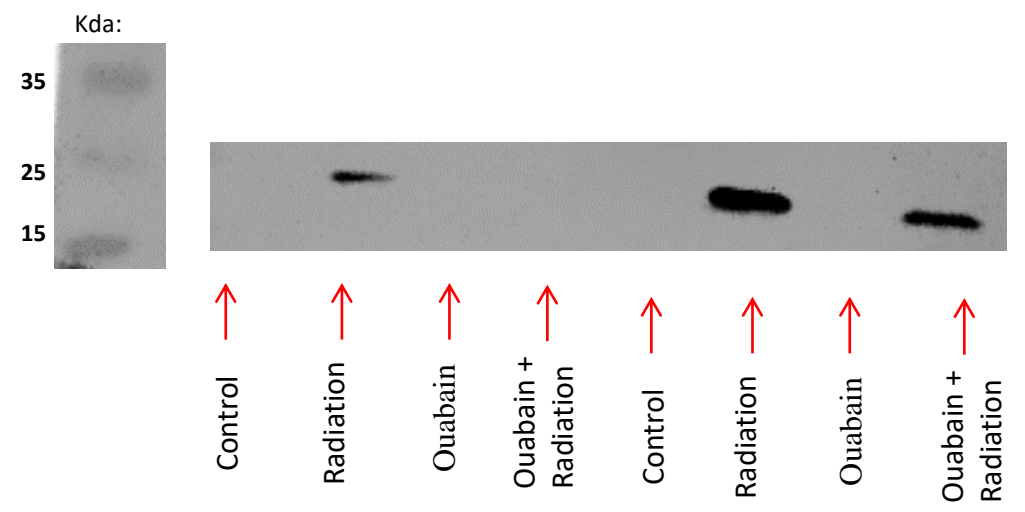

# Claudin-4

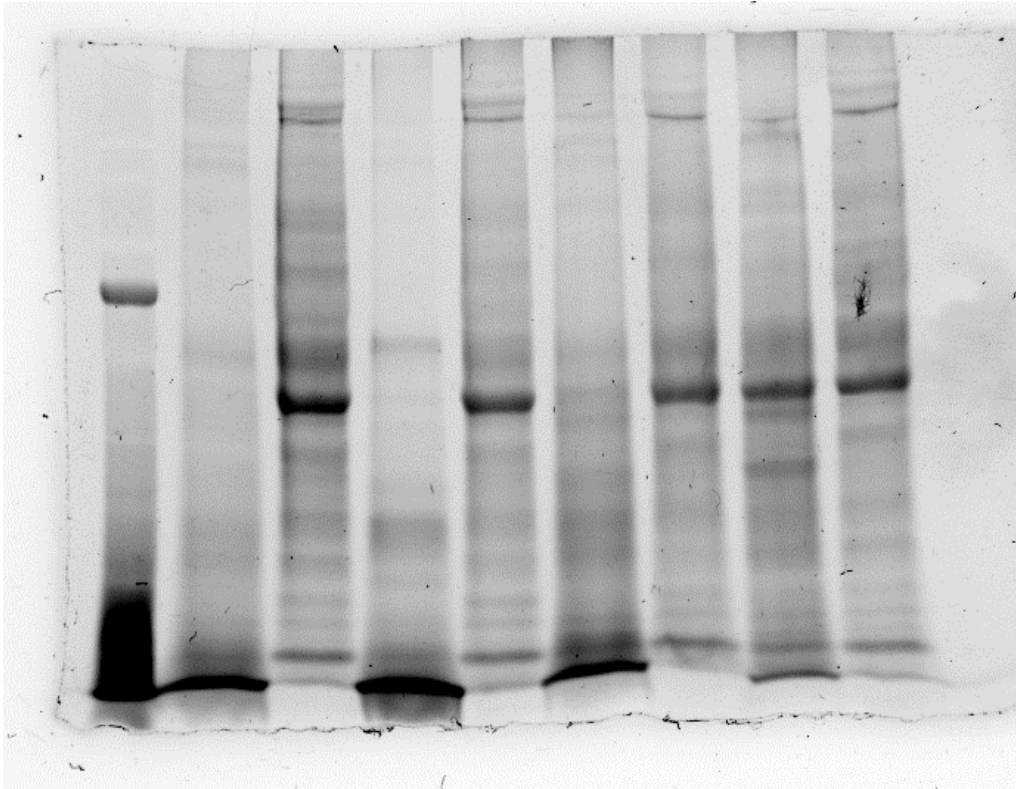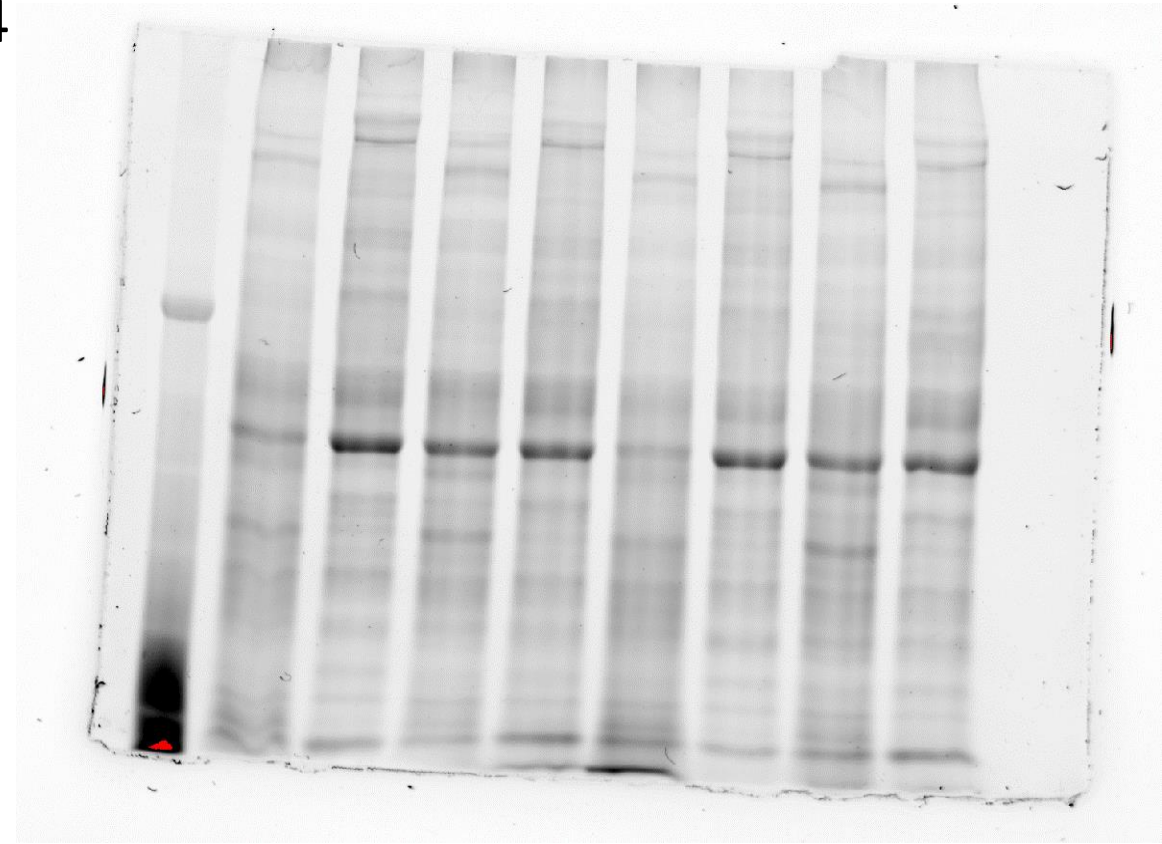

Kda:

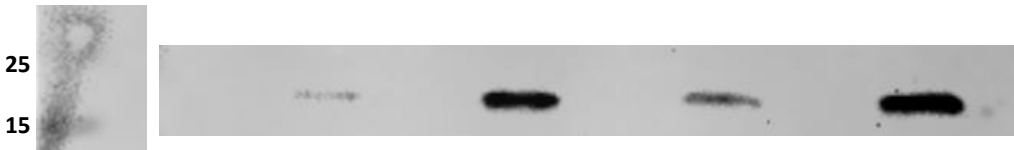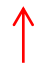

Control

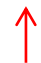

Radiation

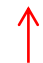

Ouabain

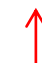

Ouabain +  
Radiation

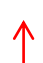

Control

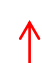

Radiation

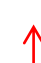

Ouabain

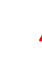

Ouabain +  
Radiation

Kda:

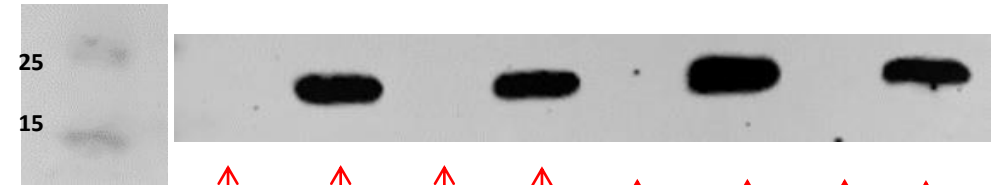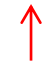

Control

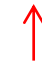

Radiation

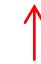

Ouabain

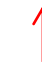

Ouabain +  
Radiation

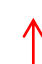

Control

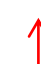

Radiation

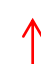

Ouabain

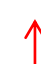

Ouabain +  
Radiation

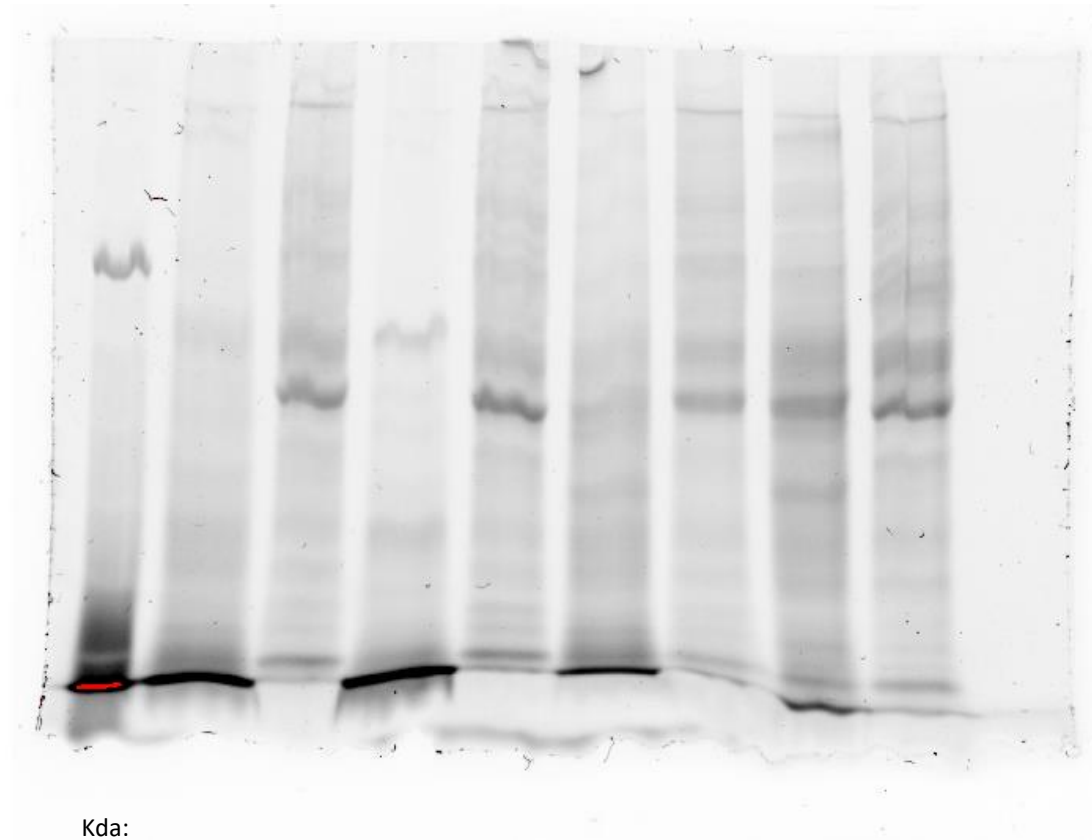

Occludin

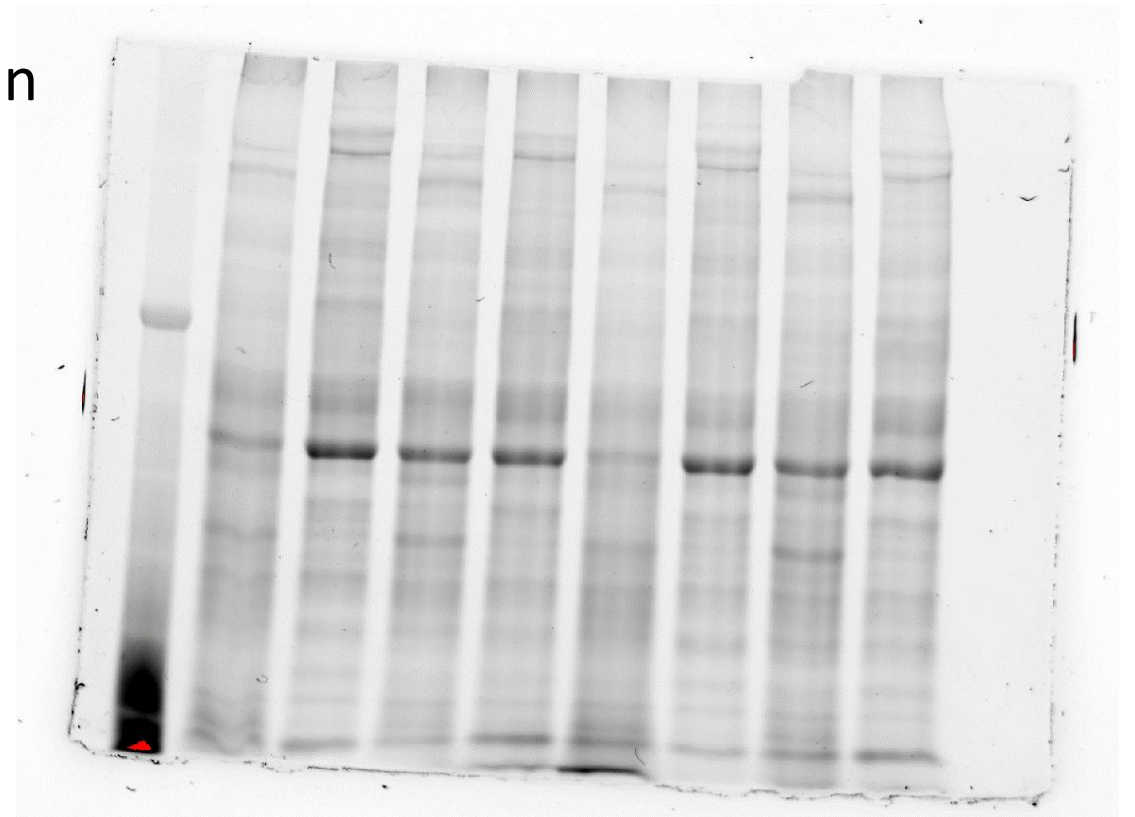

Kda:

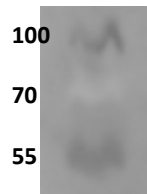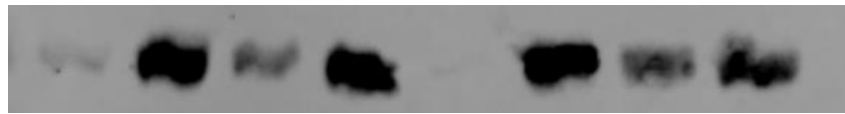

Control

Radiation

Ouabain

Ouabain +  
Radiation

Control

Radiation

Ouabain

Ouabain +  
Radiation

Kda:

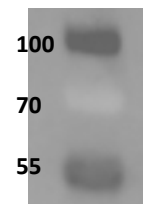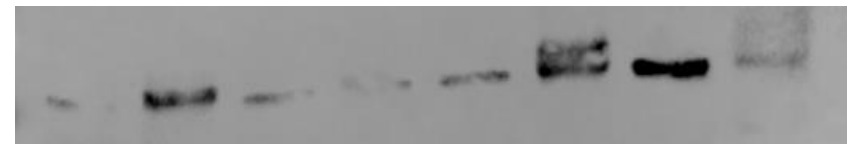

Control

Radiation

Ouabain

Ouabain +  
Radiation

Control

Radiation

Ouabain

Ouabain +  
Radiation



# Tricellulin

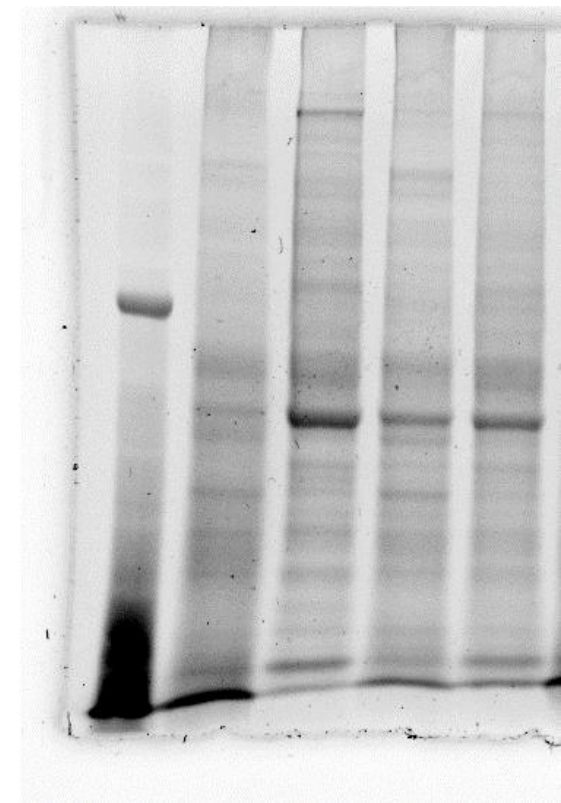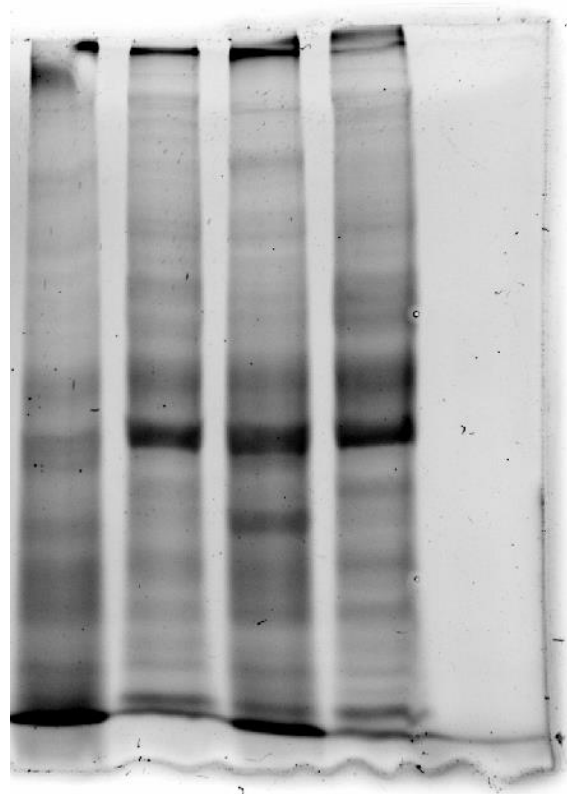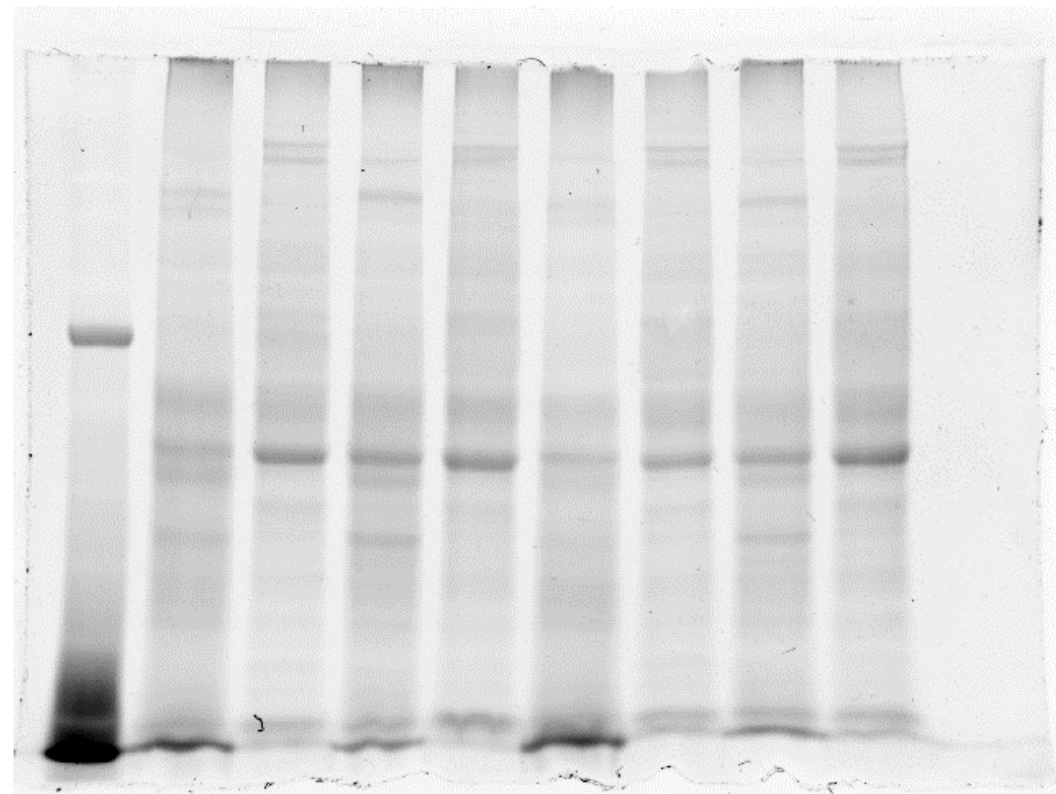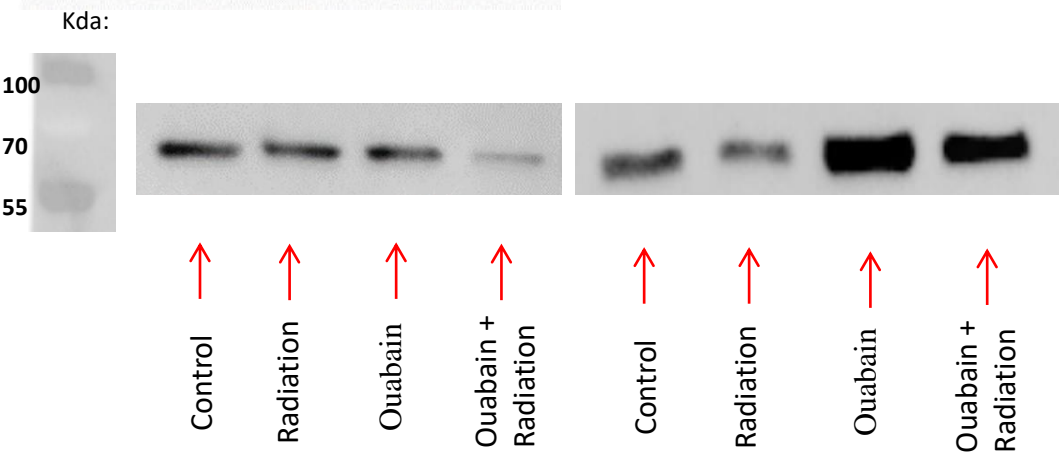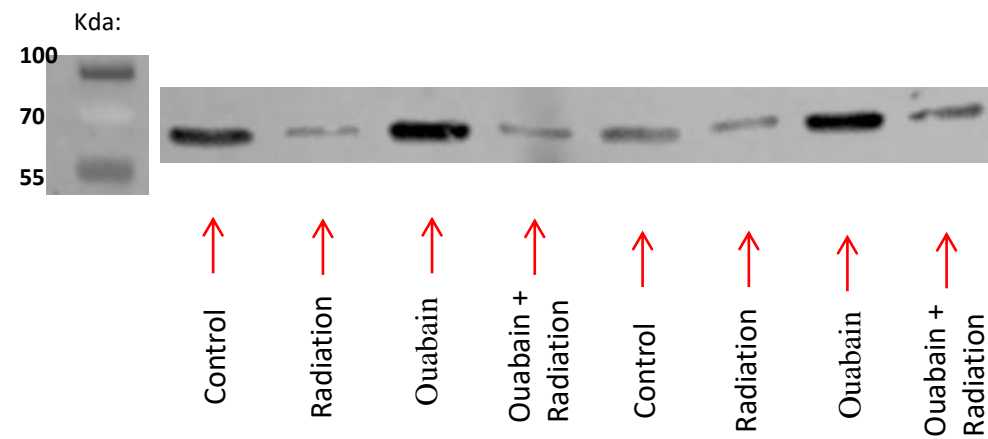

Activated caspase 3

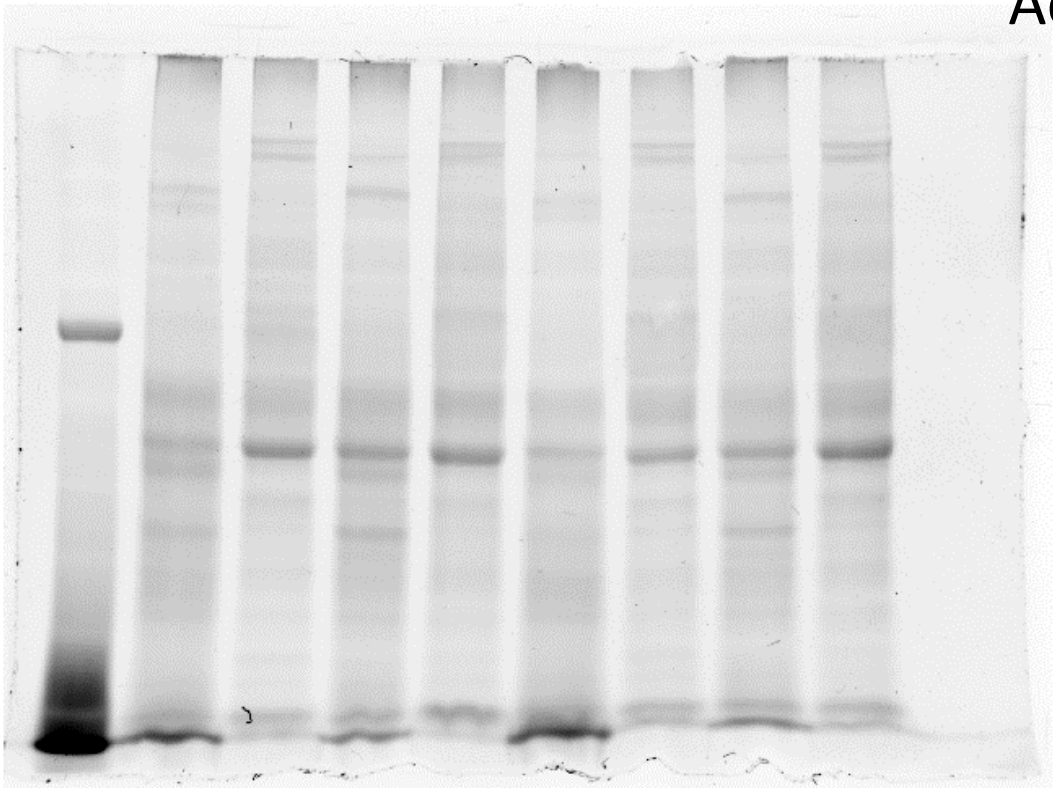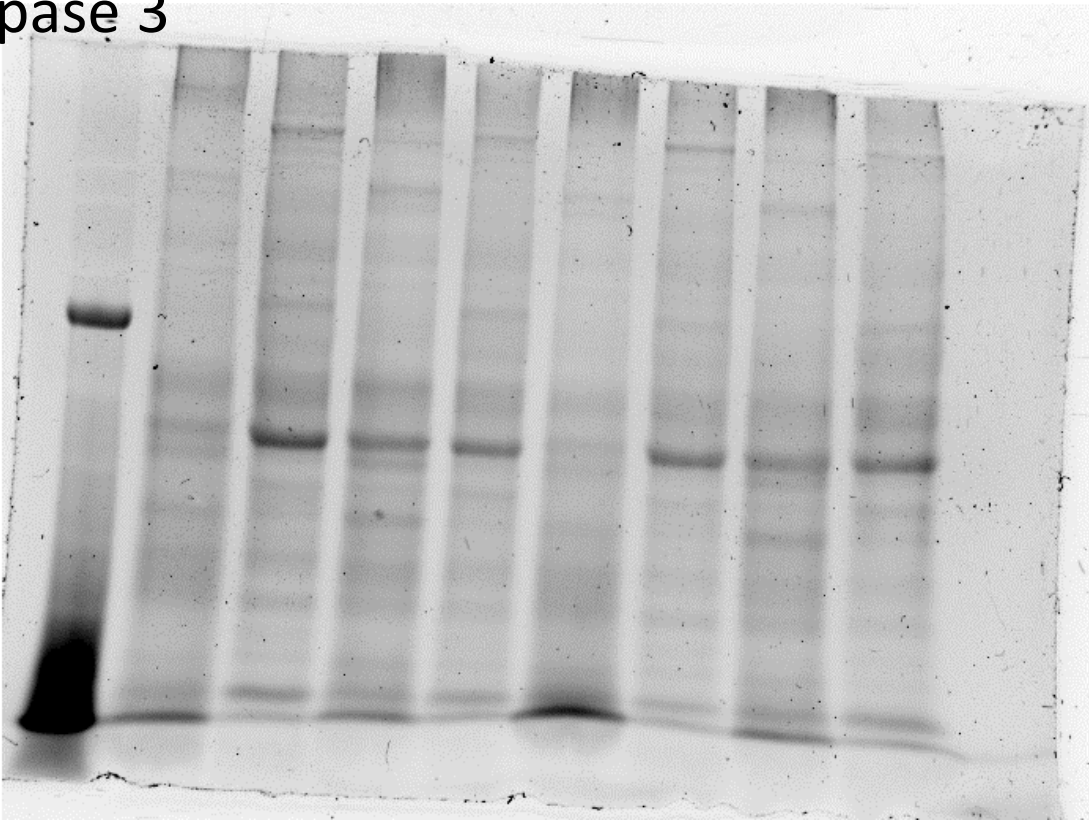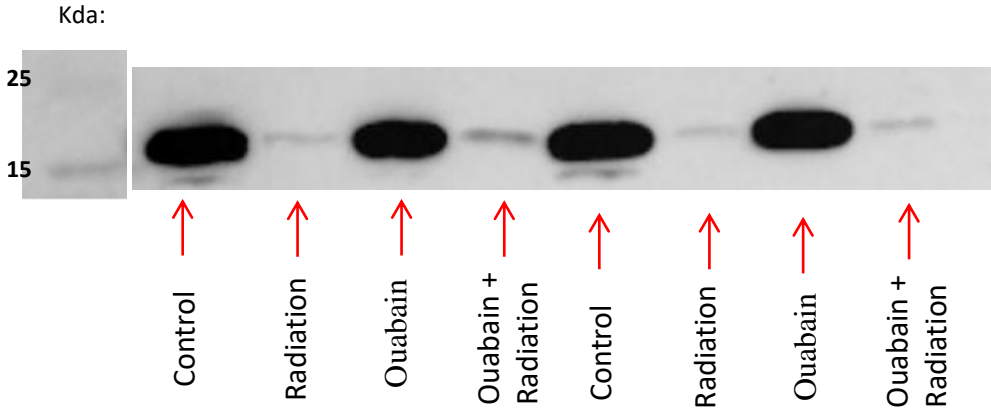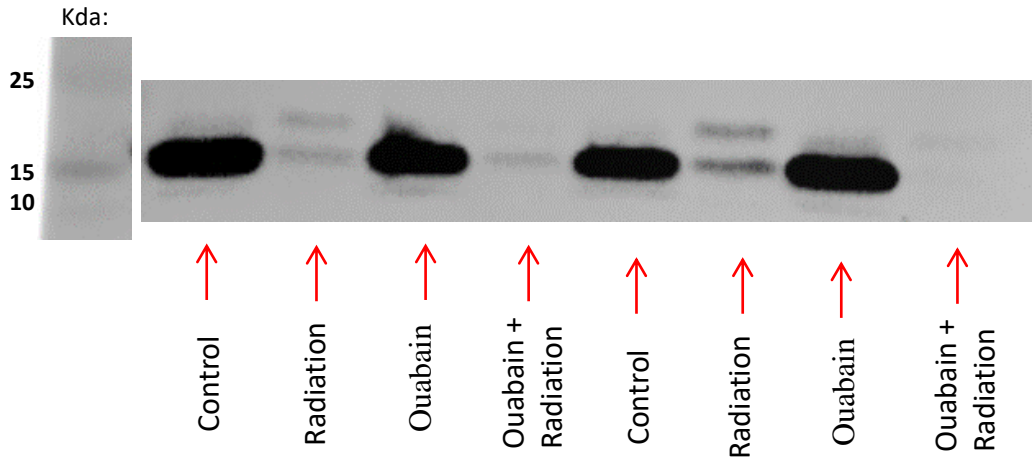



Colon

# Claudin-1

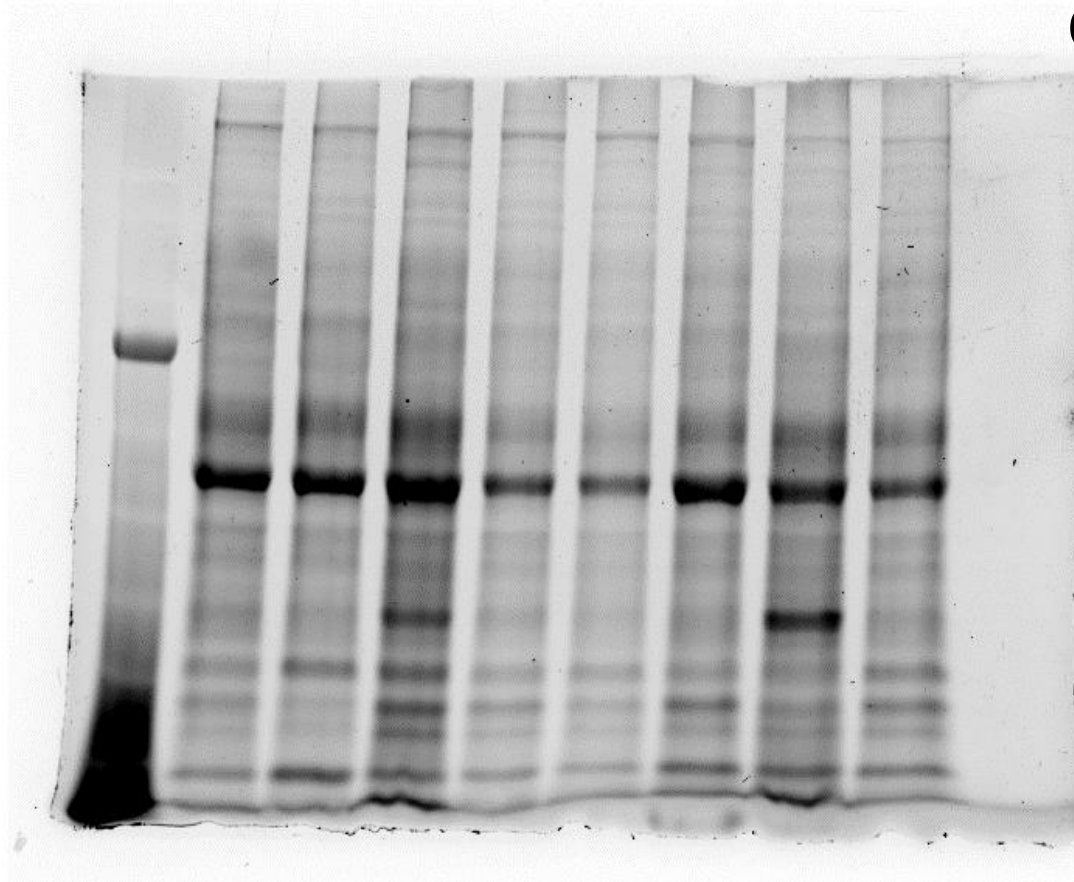

Kda:

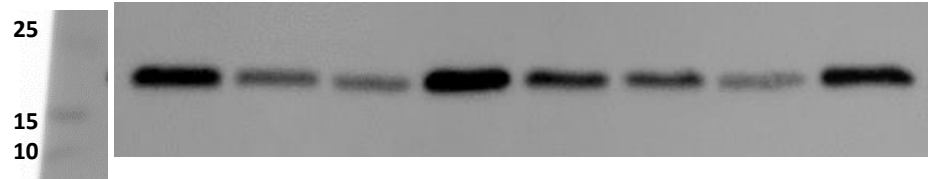

↑  
Control

↑  
Radiation

↑  
Ouabain

↑  
Ouabain +  
Radiation

↑  
Control

↑  
Radiation

↑  
Ouabain

↑  
Ouabain +  
Radiation

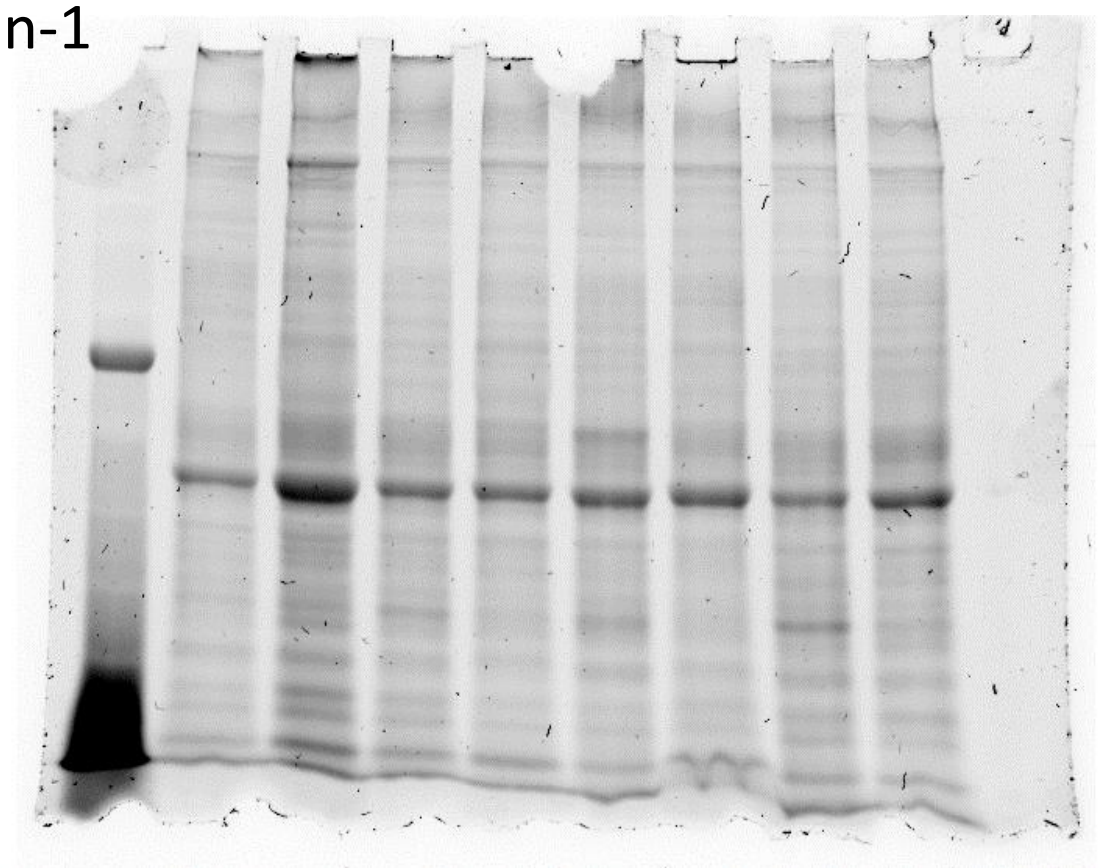

Kda:

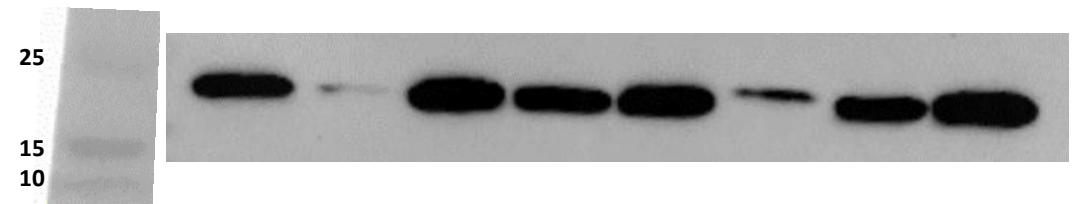

↑  
Control

↑  
Radiation

↑  
Ouabain

↑  
Ouabain +  
Radiation

↑  
Control

↑  
Radiation

↑  
Ouabain

↑  
Ouabain +  
Radiation

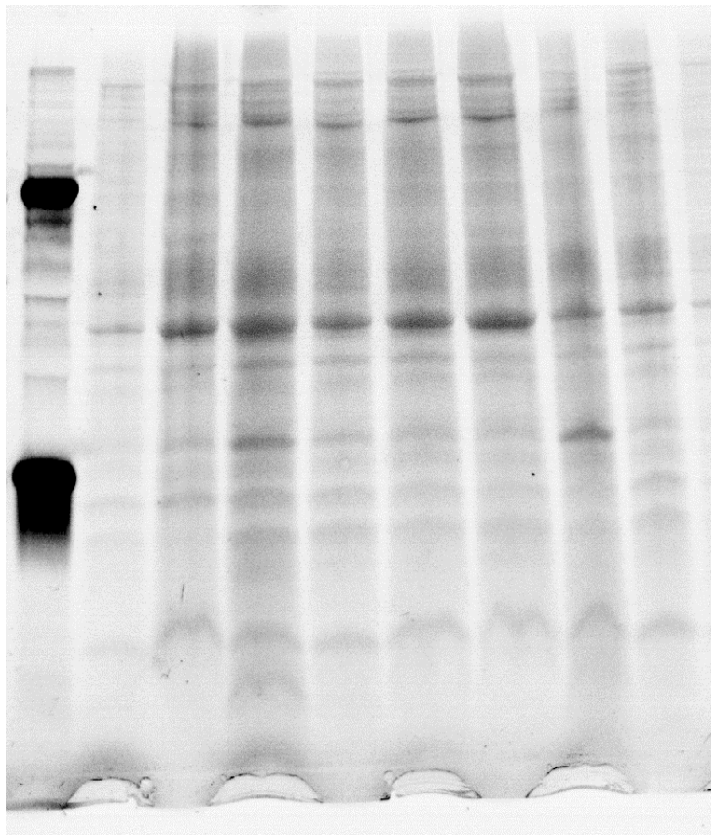

Claudin-2

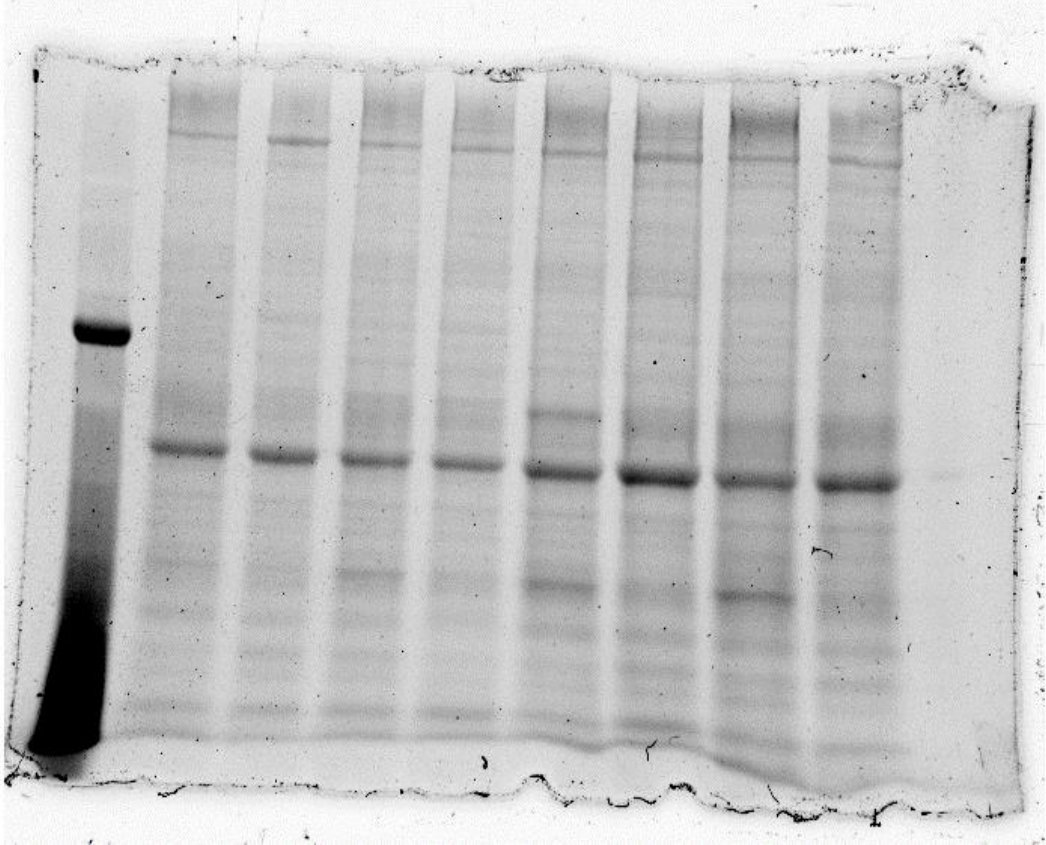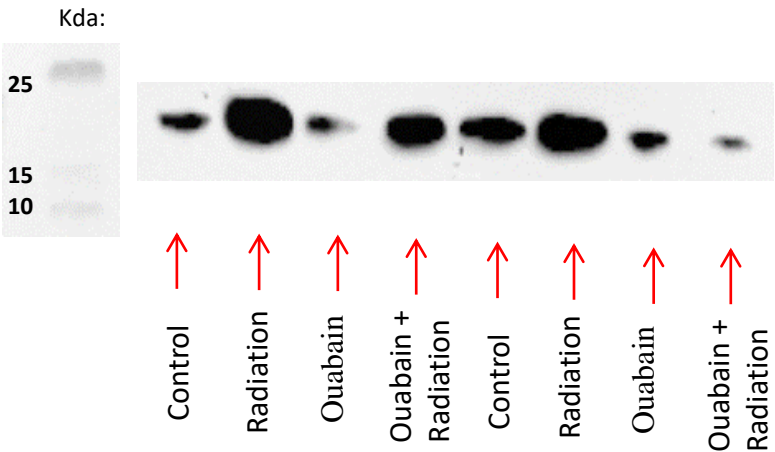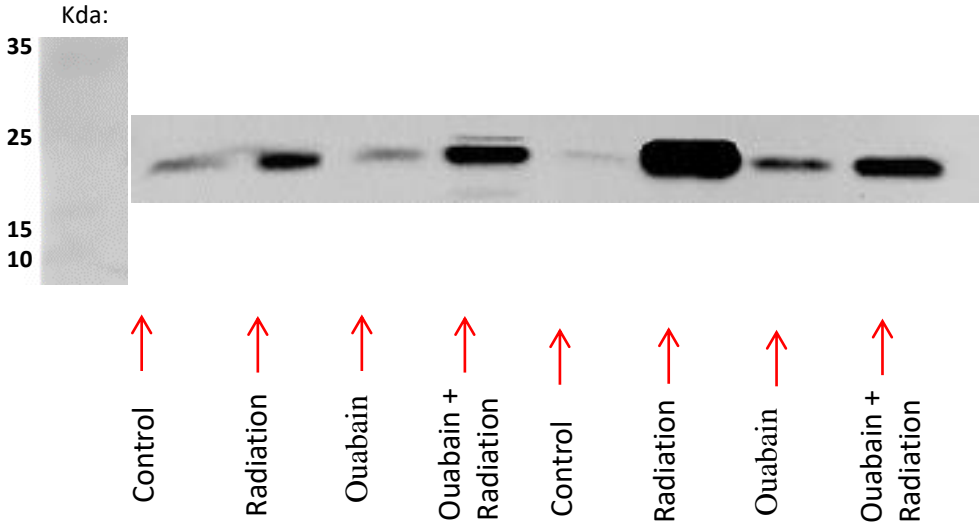



# Claudin-3

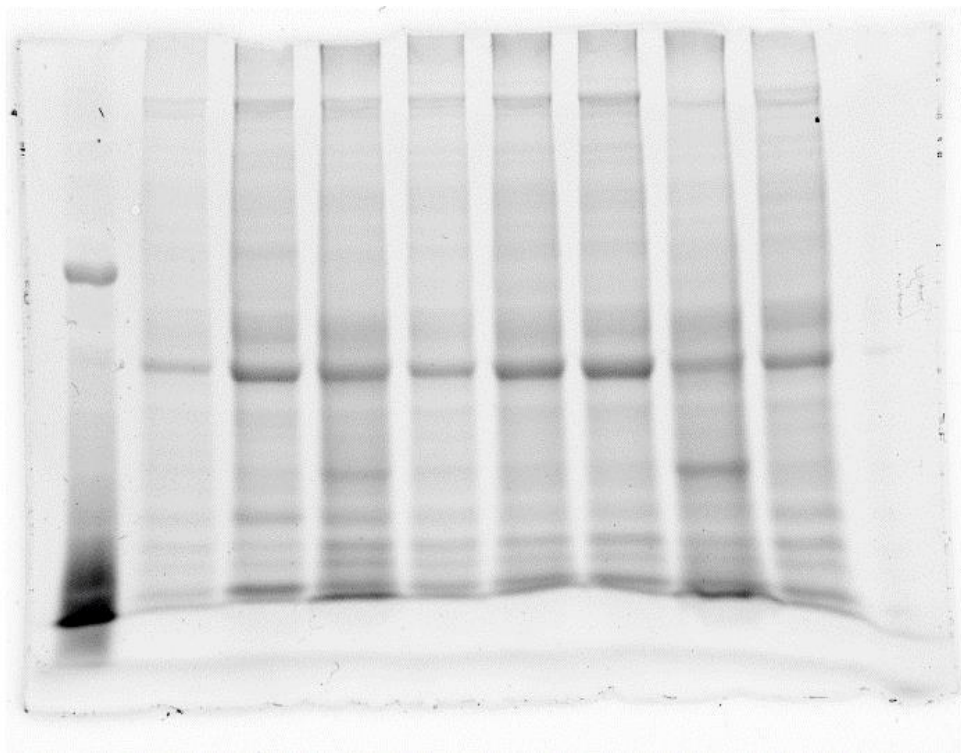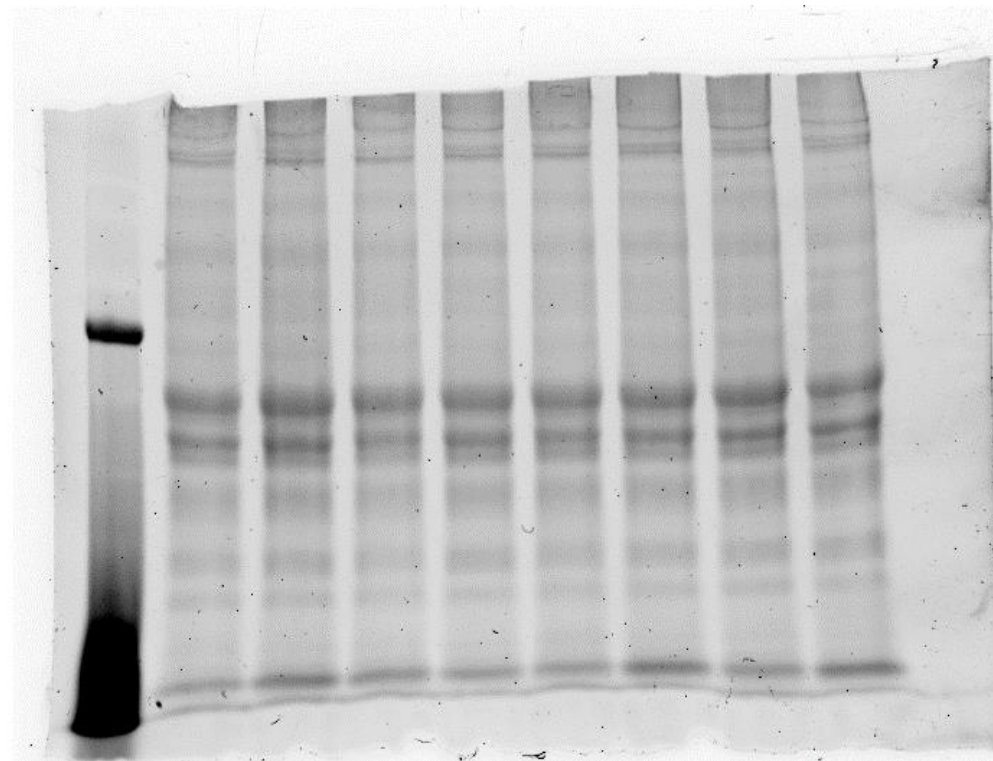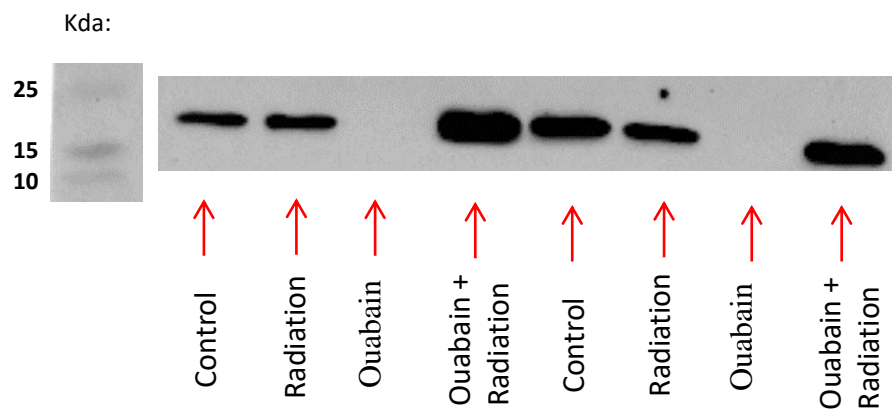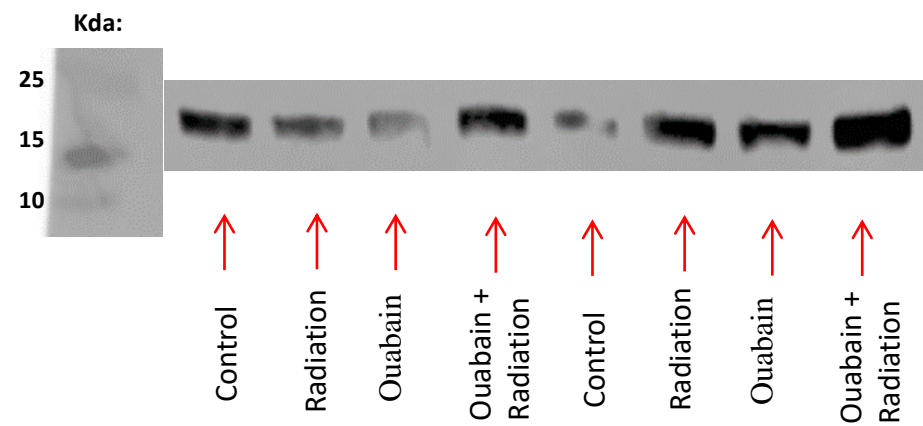

# Claudin-4

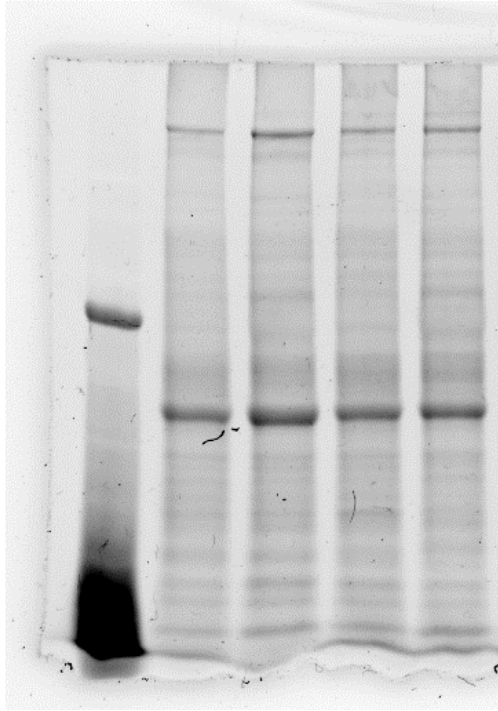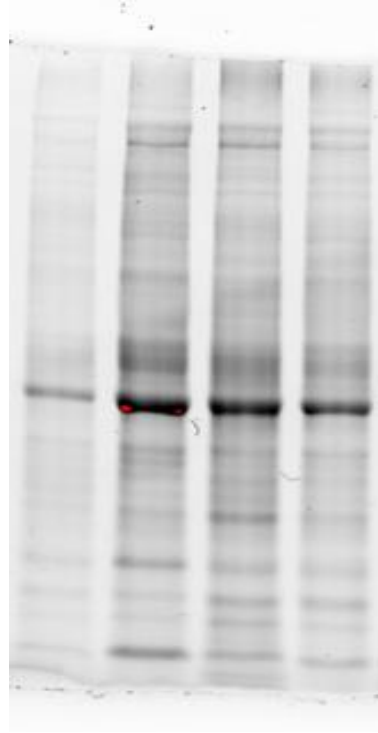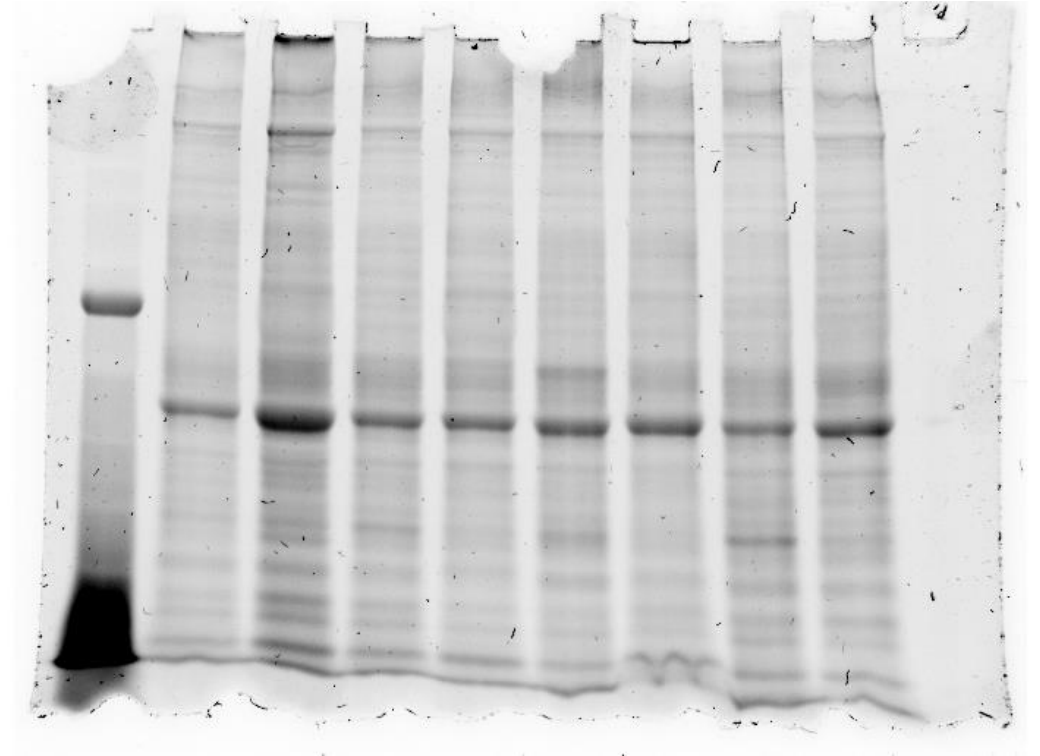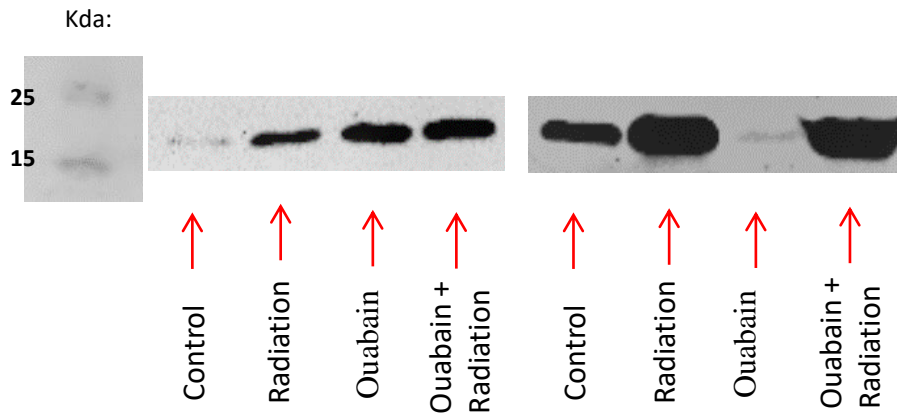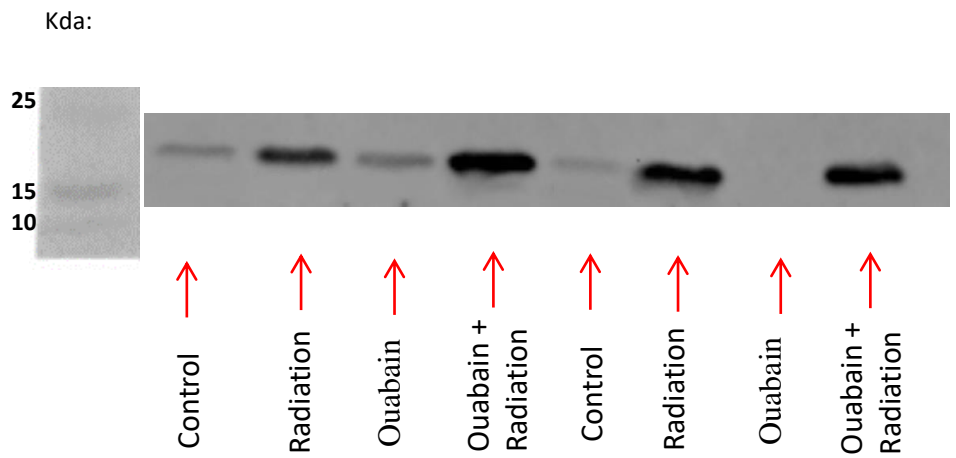

## Occludin

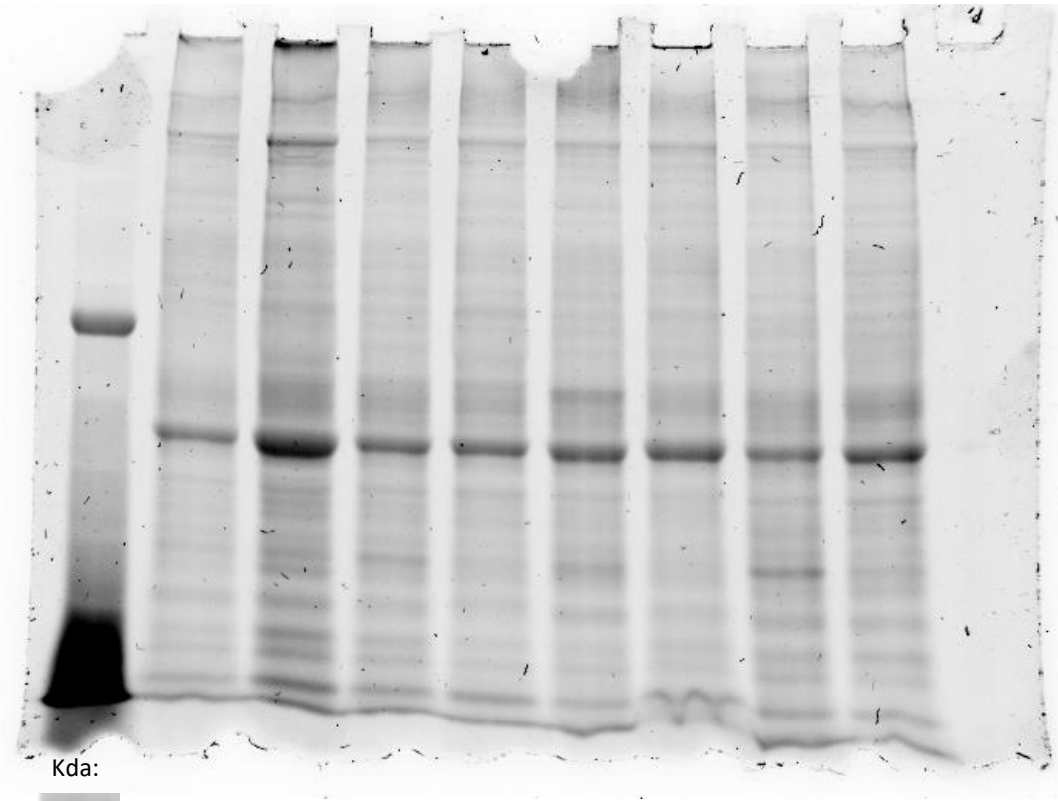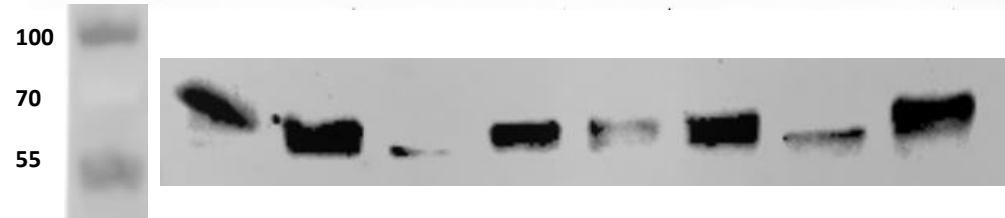

↑  
Control

↑  
Radiation

↑  
Ouabain

↑  
Ouabain +  
Radiation

↑  
Control

↑  
Radiation

↑  
Ouabain

↑  
Ouabain +  
Radiation

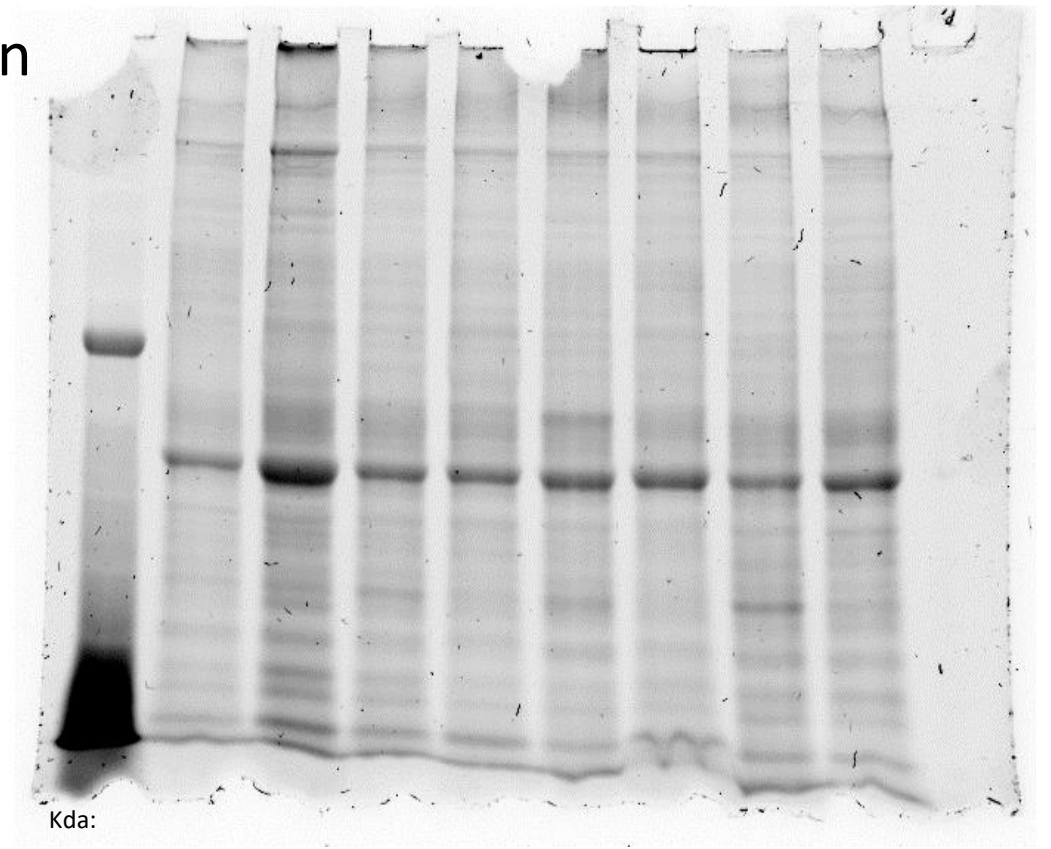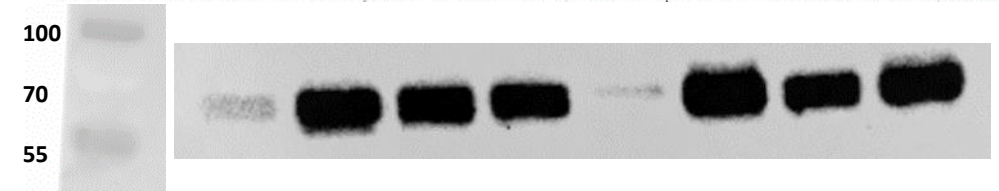

↑  
Control

↑  
Radiation

↑  
Ouabain

↑  
Ouabain +  
Radiation

↑  
Control

↑  
Radiation

↑  
Ouabain

↑  
Ouabain +  
Radiation



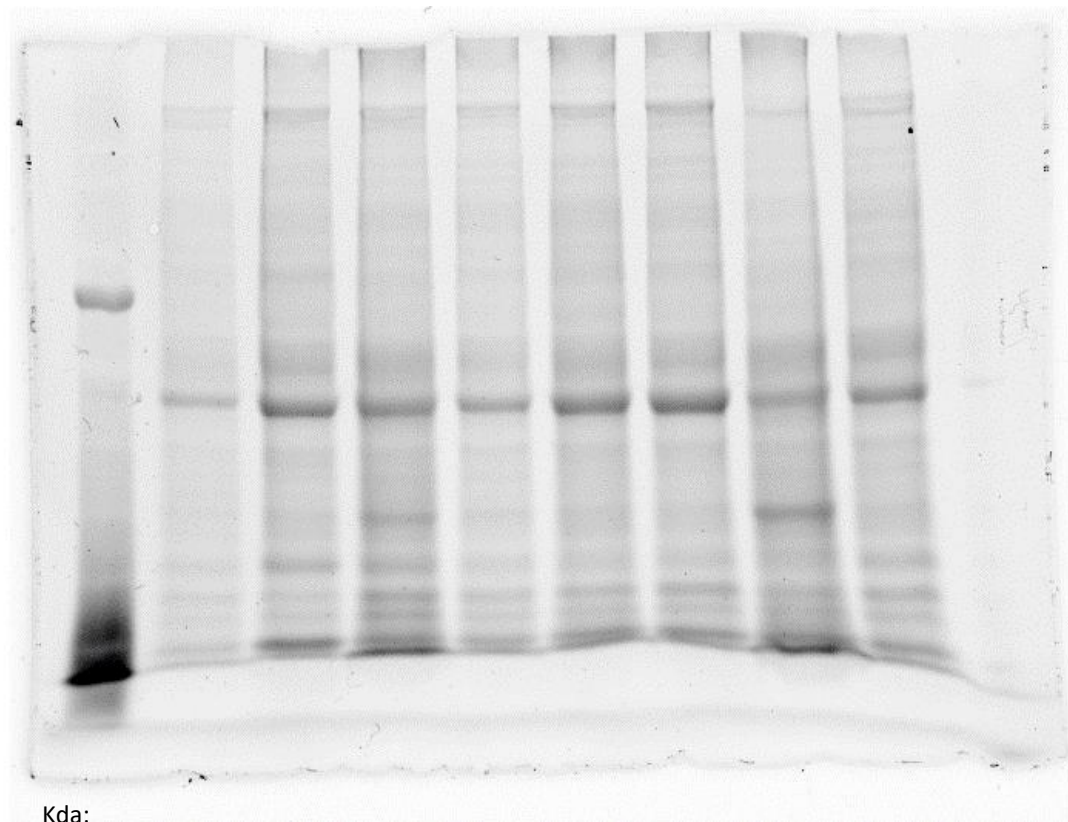

Tricellulin

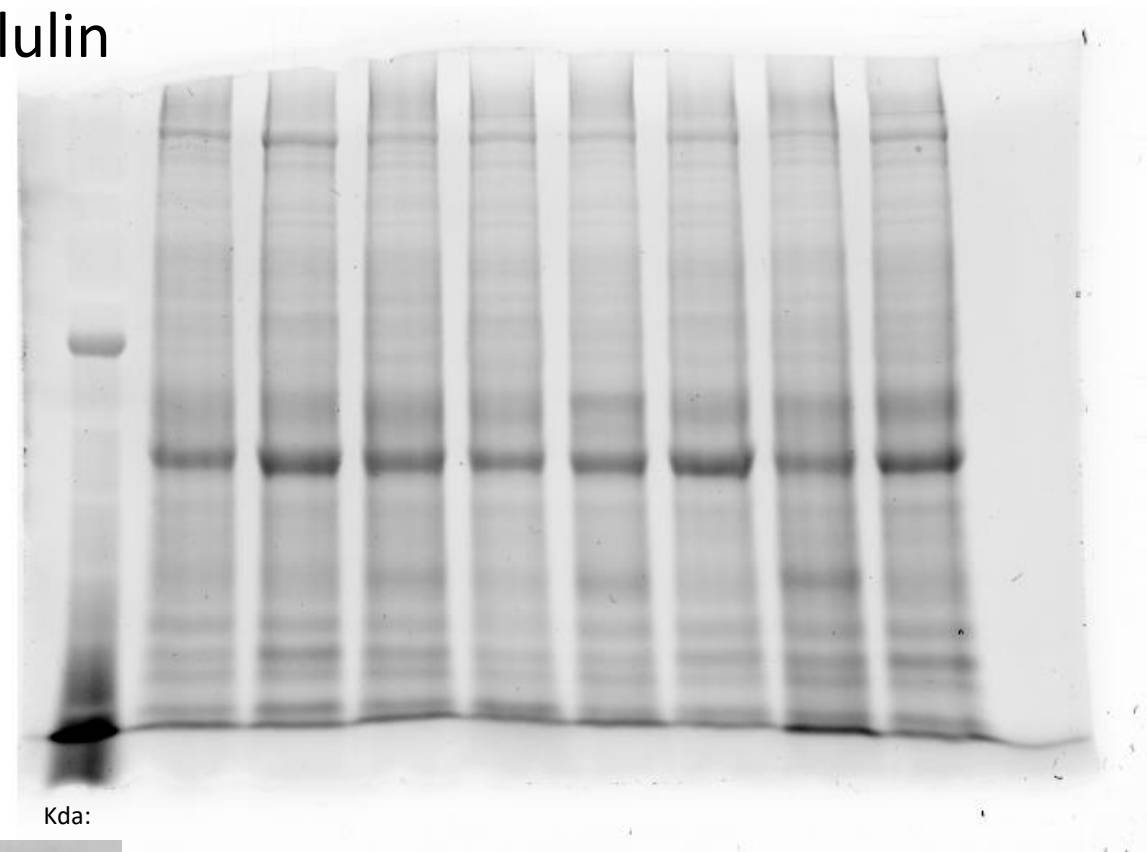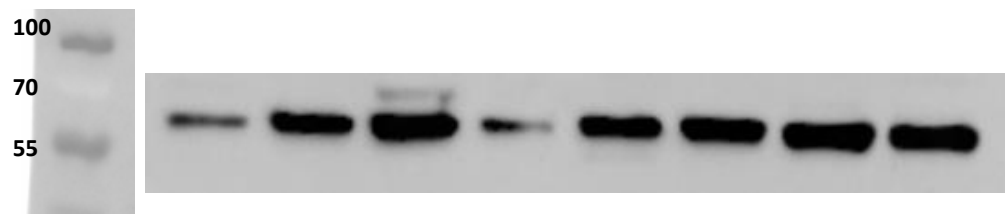

↑  
Control

↑  
Radiation

↑  
Ouabain

↑  
Ouabain +  
Radiation

↑  
Control

↑  
Radiation

↑  
Ouabain

↑  
Ouabain +  
Radiation

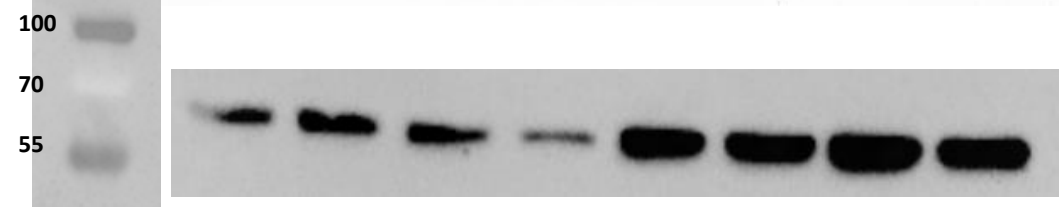

↑  
Control

↑  
Radiation

↑  
Ouabain

↑  
Ouabain +  
Radiation

↑  
Control

↑  
Radiation

↑  
Ouabain

↑  
Ouabain +  
Radiation

# Activated caspase 3

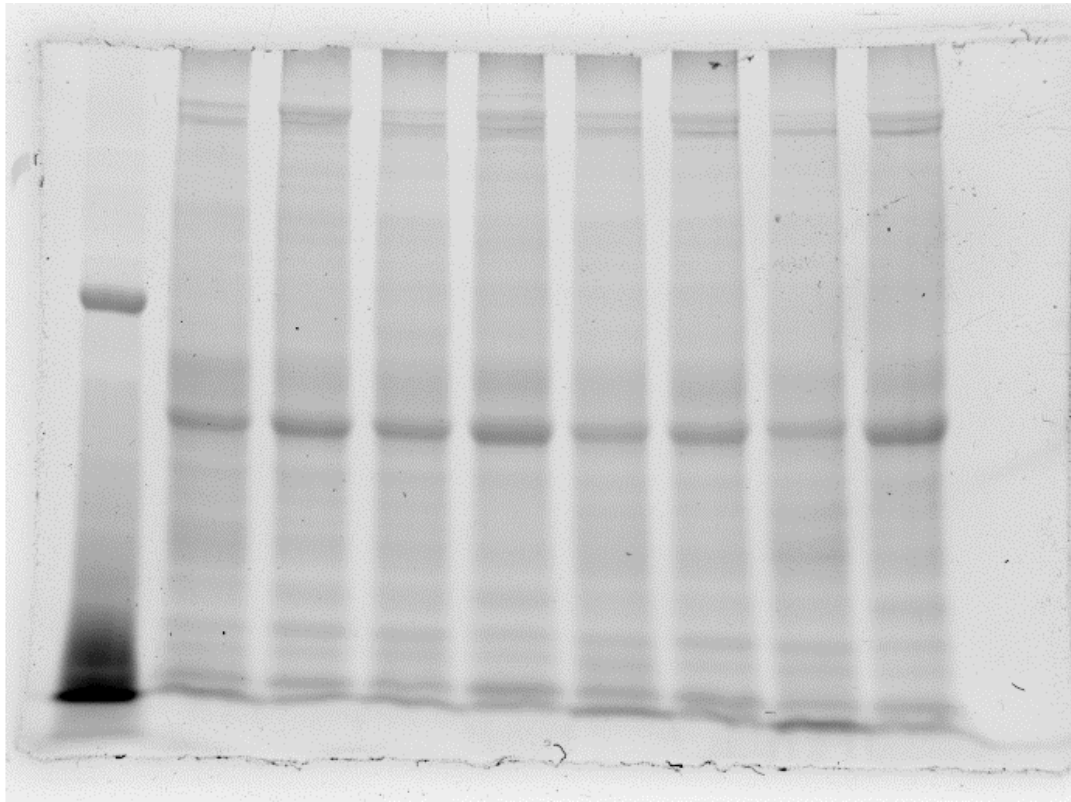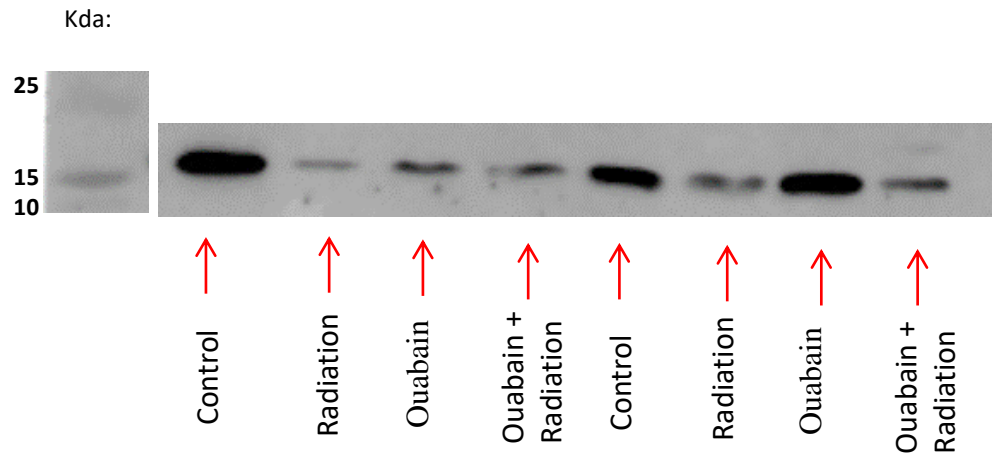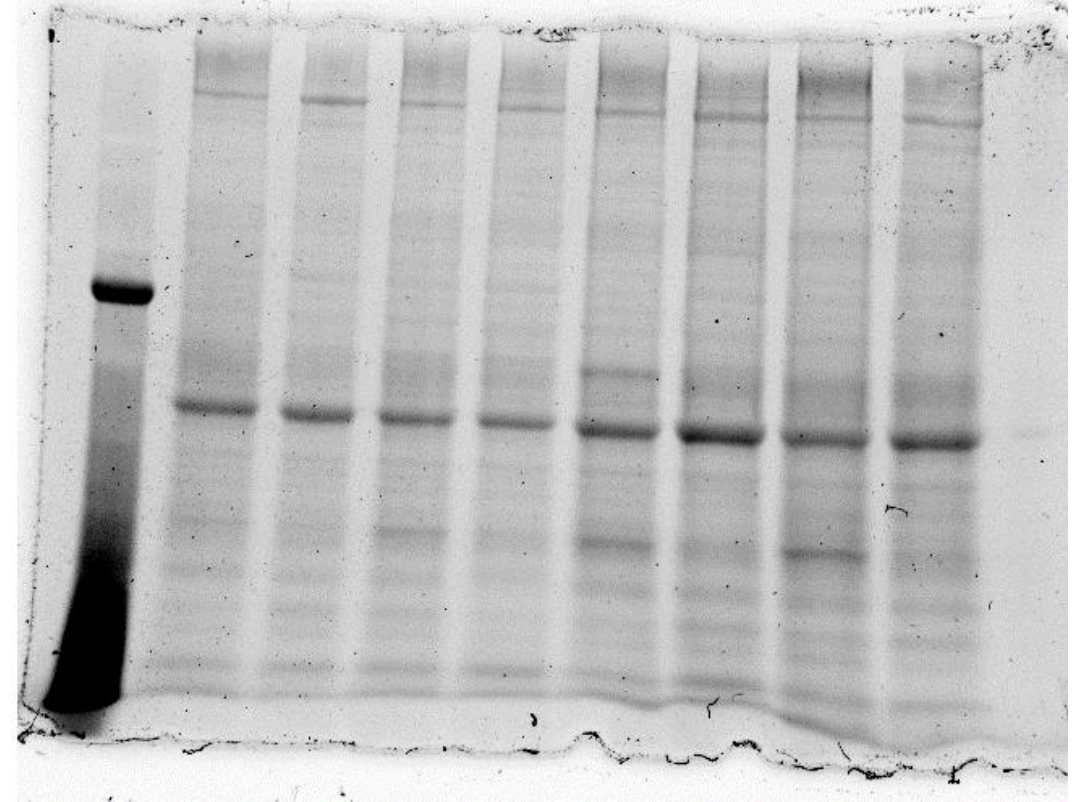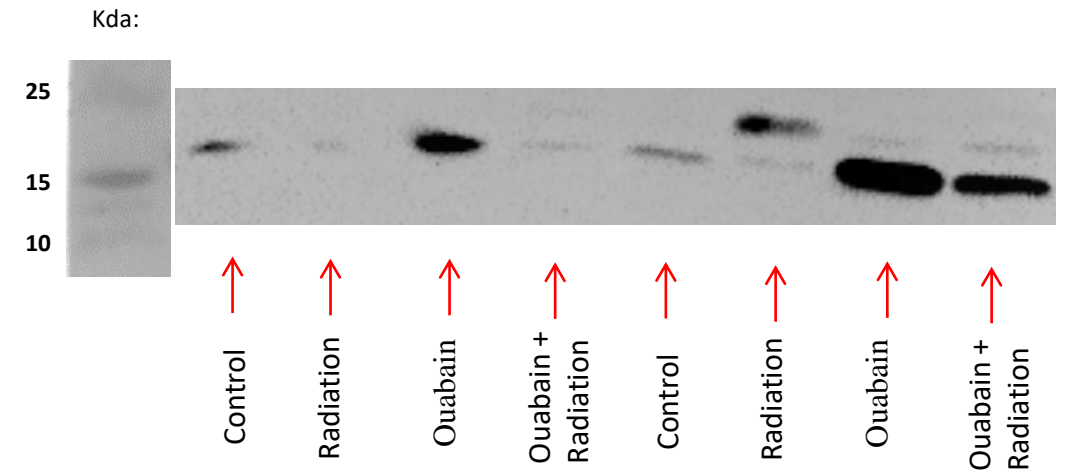

Supplement: s1 [file s1]
